# Supplementary material
Source: ML conference proceedings conference paper supplement (https://openreview.net/forum?id=BbWrp6O8Lm)
Supplement: supplementary_material [file NeurIPS_2025_ID15267_supplementary_material.pdf › TextHalu-Bench/NeurIPS_2025_ID15267_supplementary_material.pdf]

---

# Supplementary Material– When Semantics Mislead Vision: Mitigating Large Multimodal Models Hallucinations in Scene Text Spotting and Understanding

---

Anonymous Author(s)

Affiliation

Address

email

1

2 In this Supplementary Material, we provide additional resources to support the evaluation and under-  
3 standing of TextHalu-Bench. Specifically, we include our testing script **eval.py**, which demonstrates  
4 how to evaluate MLLMs on our benchmark using example data. To facilitate quick testing and clarity,  
5 we also provide five annotated image-text pairs for each of the five scenario categories—*Business*,  
6 *Industry*, *Transportation*, *Public Facilities*, and *Daily Life*. These samples are carefully selected to  
7 illustrate the typical challenges within each domain and help users better understand the evaluation  
8 format.
